# Supplementary material for: Bud-Localization of CLB2 mRNA Can Constitute a Growth Rate Dependent Daughter Sizer
Source: PLOS journal article supplement (doi:10.1371/journal.pcbi.1004223), 2015-04-24
Supplement: S12 (10.1371/journal.pcbi.1004223.s012) [file journal.pcbi.1004223.s012]

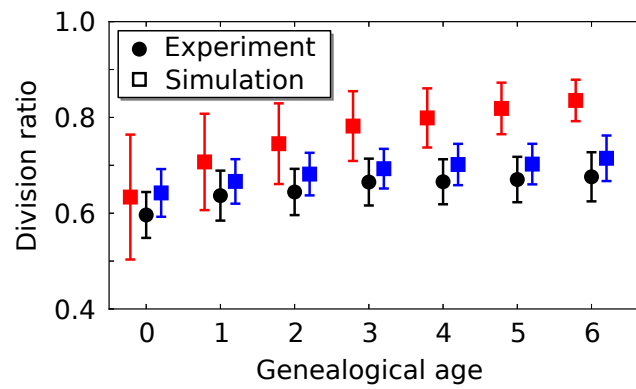

**Figure S12: Division ratios for different genealogical ages for slow growing *in silico* cells.** Volume fraction of cell and bud at division is shown as a function of replicative age for data from experiments [1] (black dots) and from simulations of slow growing cells (ethanol) with Model-1 (red squares) and Model-2 (blue squares).

- [1] Natalie A Cookson, Scott W Cookson, Lev S Tsimring, and Jeff Hasty. Cell cycle-dependent variations in protein concentration. *Nucleic Acids Research*, 38(8):2676–2681, December 2009.
